# Supplementary material
Source: PubMed Central journal article supplement (PMC5729588)
Supplement: NIHMS920647-supplement-Supplemental.pdf [file NIHMS920647-supplement-Supplemental.pdf]

## **Supplemental Material: Epistasis between TIFAB and miR-146a, neighboring genes in del(5q) MDS**

### **Supplemental Methods**

#### **Mice and bone marrow transplantation.**

*Tifab*<sup>-/-</sup> C57Bl/6 mice were described previously<sup>1</sup>. miR-146a<sup>-/-</sup> C57BL/6 mice were obtained from Dr. David Baltimore as previously described<sup>2</sup>. All animals were bred and housed in the Association for Assessment and Accreditation of Laboratory Animal Care-accredited animal facility of Cincinnati Children's Hospital Medical Center. For non-competitive BM transplantation, BM mononuclear cells (0.3-3x10<sup>6</sup>) from C7BL/6 wild-type, *Tifab*<sup>-/-</sup>, miR-146a<sup>-/-</sup>, or *Tifab*<sup>-/-</sup>;miR-146a<sup>-/-</sup> mice were injected *i.v.* into lethally-radiated (7.0 Gy and 4.75 Gy after 3 hours) syngeneic recipient Boy/J mice.

#### **BM and PB analysis**

For cytopins, 2.5-5x10<sup>5</sup> BM cells were spun onto slide at 300 rpm for 5 minutes and then stained with Wright-Giemsa. For BM sections, tibias were fixed in formalin and then stained with hematoxylin and eosin. Complete blood counts were performed on peripheral blood isolated from the tail vein every 4 weeks and analyzed using the Drew Scientific Hemavet 950.

#### **Quantitative PCR analysis**

RNA was extracted from cells and purified with Trizol Reagent (Life Technologies 15596-026) or Quick-RNA MiniPrep Kit (Zymo Research R1055). cDNA was generated using a high capacity RNA to cDNA kit (Life Technologies 4387406 or 4368814). qPCR was carried out using Taqman Master mix and probes (Life Technologies): *Tifab* (Mm0421026\_m1) and *Gapdh* (Mm99999915\_g1). qPCR was performed on an Applied Biosystems StepOne Plus Real-Time PCR System. miR-146a expression was performed as previously described<sup>3</sup>.

#### **Clonogenic progenitor assays**

Hematopoietic clonogenic progenitor frequencies were determined by plating 2x10<sup>5</sup> BM cells/ml isolated from transplanted wild-type, *Tifab*<sup>-/-</sup>, miR-146a<sup>-/-</sup>, or *Tifab*<sup>-/-</sup>;miR-146a<sup>-/-</sup> mice in methylcellulose media containing human erythropoietin, murine SCF, murine IL-3, and human IL-6 (Methocult M3434; Stem Cell Technologies). Colonies were scored after 10 days.

#### **Flow cytometry analysis**

Antibodies used for flow cytometric analysis of BM and PB cells are described previously<sup>1</sup>. All FACS analyses were performed on BD FACS Aria or Canto machines. FACS data analysis was performed using BD FACSDiva or FlowJo software.

#### **Patient samples**

Informed consent was obtained according to protocols approved by the review board of Cleveland Clinic. Diagnoses were reviewed at Cleveland Clinic and adapted, when required, to WHO 2008 criteria. For microarray and SNP analysis, BM mononuclear cells were isolated from MDS/AML patients, as previously described<sup>2</sup>.

### **RNA sequencing analysis**

Transcriptomes of lineage<sup>-</sup>cKit<sup>+</sup> BM cells from wild-type (WT, n=3), *Tifab*<sup>-/-</sup> knockout (TIFAB-KO, n=3), *miR-146a*<sup>-/-</sup> (miR146a-KO, n=3), *Tifab*<sup>-/-</sup>; *miR-146a*<sup>-/-</sup> mice (dKO, n=4) were compared by standard RNA-seq analysis methods. Total RNA was amplified using the Ovation RNA-Seq System v2 (NuGEN) according to the manufacturer's protocol. The libraries were prepared with the Nextera XT DNA Sample Preparation kit (Illumina Technologies). 1 ng of cDNA was suspended in Tagment DNA Buffer, and tagmentation (fragmentation and tagging with the adaptors) was performed with the Nextera enzyme (Amplicon Tagment Mix), incubating at 55°C for 10 min. NT Buffer was then added to neutralize the samples. Libraries were prepared by PCR with the Nextera PCR Master Mix, and 2 Nextera Indexes (N7XX, and N5XX) according to the following program: one cycle of 72°C for 3min, one cycle of 98°C for 30s, 12 cycles of 95°C for 10s, 55°C for 30s, and 72°C for 1min, and one cycle of 72°C for 5min. The purified cDNA was captured on an Illumina flow cell for cluster generation. Libraries were sequenced on the Illumina HiSeq2500 following the manufacturer's protocol. Paired-end reads were aligned to UCSC mm10 genome (downloaded from Illumina's iGenomes repository; [https://support.illumina.com/sequencing/sequencing\\_software/igenome.html](https://support.illumina.com/sequencing/sequencing_software/igenome.html)) using TopHat<sup>4</sup> and mouse mm10-refseq gene GTF file. FeatureCounts was used for read counting<sup>5</sup>. Differentially expressed genes were predicted by three independent methods including limma/voom<sup>6,7</sup>, edgeR<sup>8</sup>, and DESeq2<sup>9</sup>. FDR < 0.05 and fold change > 2x were used for default cutoffs.

### **Synergy gene analysis**

To examine synergistic effects, we adopted a concept used in McMurray *et al*<sup>10</sup>. Briefly, *a* = fold change value for a given gene in the *miR-146a*<sup>-/-</sup> group, *b* = fold change value for the same gene in the *Tifab*<sup>-/-</sup> group, and *d* = mean expression value for this gene in the dKO group. Then synergy score was calculated using  $(a+b)/d$  if  $d > 1$  and  $d/a + d/b$  if  $d < 1$ .

## Supplemental References

1. Varney, M.E. *et al.* Loss of Tifab, a del(5q) MDS gene, alters hematopoiesis through derepression of Toll-like receptor-TRAF6 signaling. *J Exp Med* **212**, 1967-85 (2015).
2. Fang, J. *et al.* Myeloid malignancies with chromosome 5q deletions acquire a dependency on an intrachromosomal NF-kappaB gene network. *Cell Rep* **8**, 1328-38 (2014).
3. Starczynowski, D.T. *et al.* MicroRNA-146a disrupts hematopoietic differentiation and survival. *Exp Hematol* **39**, 167-178 e4 (2011).
4. Trapnell, C., Pachter, L. & Salzberg, S.L. TopHat: discovering splice junctions with RNA-Seq. *Bioinformatics* **25**, 1105-11 (2009).
5. Liao, Y., Smyth, G.K. & Shi, W. featureCounts: an efficient general purpose program for assigning sequence reads to genomic features. *Bioinformatics* **30**, 923-30 (2014).
6. Law, C.W., Chen, Y., Shi, W. & Smyth, G.K. voom: Precision weights unlock linear model analysis tools for RNA-seq read counts. *Genome Biol* **15**, R29 (2014).
7. Ritchie, M.E. *et al.* limma powers differential expression analyses for RNA-sequencing and microarray studies. *Nucleic Acids Res* **43**, e47 (2015).
8. Robinson, M.D., McCarthy, D.J. & Smyth, G.K. edgeR: a Bioconductor package for differential expression analysis of digital gene expression data. *Bioinformatics* **26**, 139-40 (2010).
9. Love, M.I., Huber, W. & Anders, S. Moderated estimation of fold change and dispersion for RNA-seq data with DESeq2. *Genome Biol* **15**, 550 (2014).
10. McMurray, H.R. *et al.* Synergistic response to oncogenic mutations defines gene class critical to cancer phenotype. *Nature* **453**, 1112-6 (2008).

Supplemental Figure 1

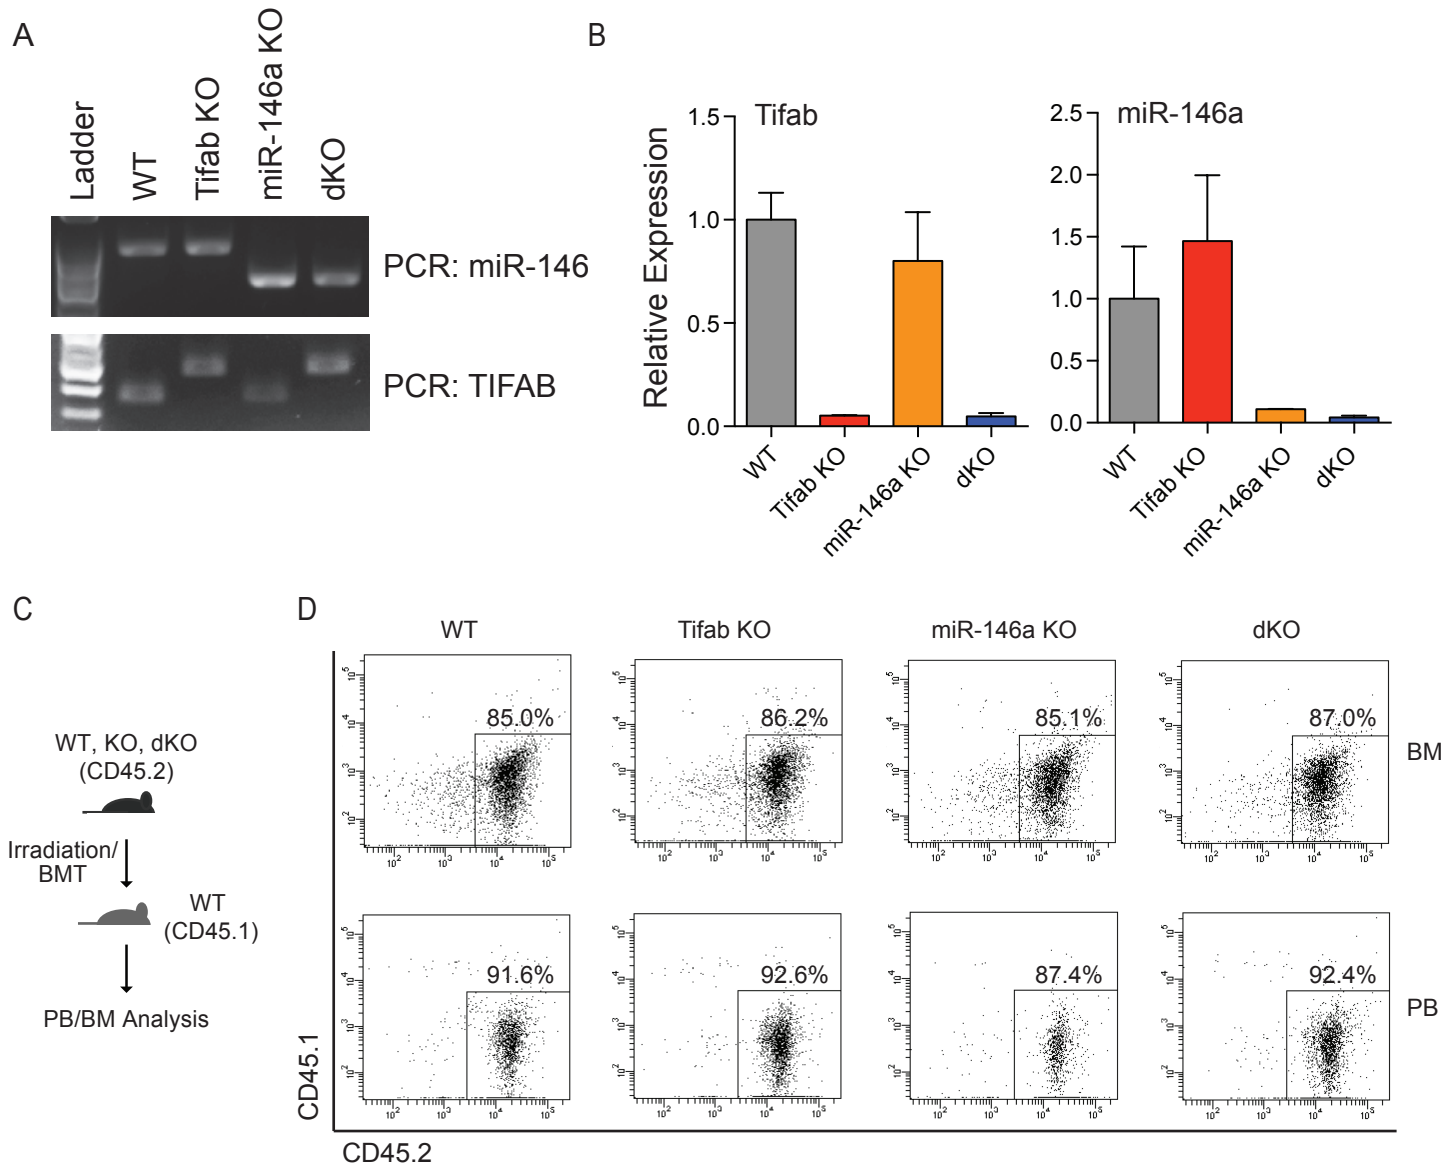

**Generation of Tifab and miR-146a double knockout mice.** (A) PCR was performed using primers to detect wild-type or deleted miR-146a and Tifab alleles on genomic DNA. (B) Quantitative RT-PCR was performed to measure Tifab mRNA or miR-146a from BM mononuclear cells. (C) Overview of transplantation of BM cells from WT, Tifab KO, miR-146a KO, and dKO (CD45.2) mice into lethally-irradiated WT CD45.1 mice. (D) Proportion of donor cells in the peripheral blood and BM of recipient mice (n = 3 mice evaluated per group).



## Supplemental Figure 2

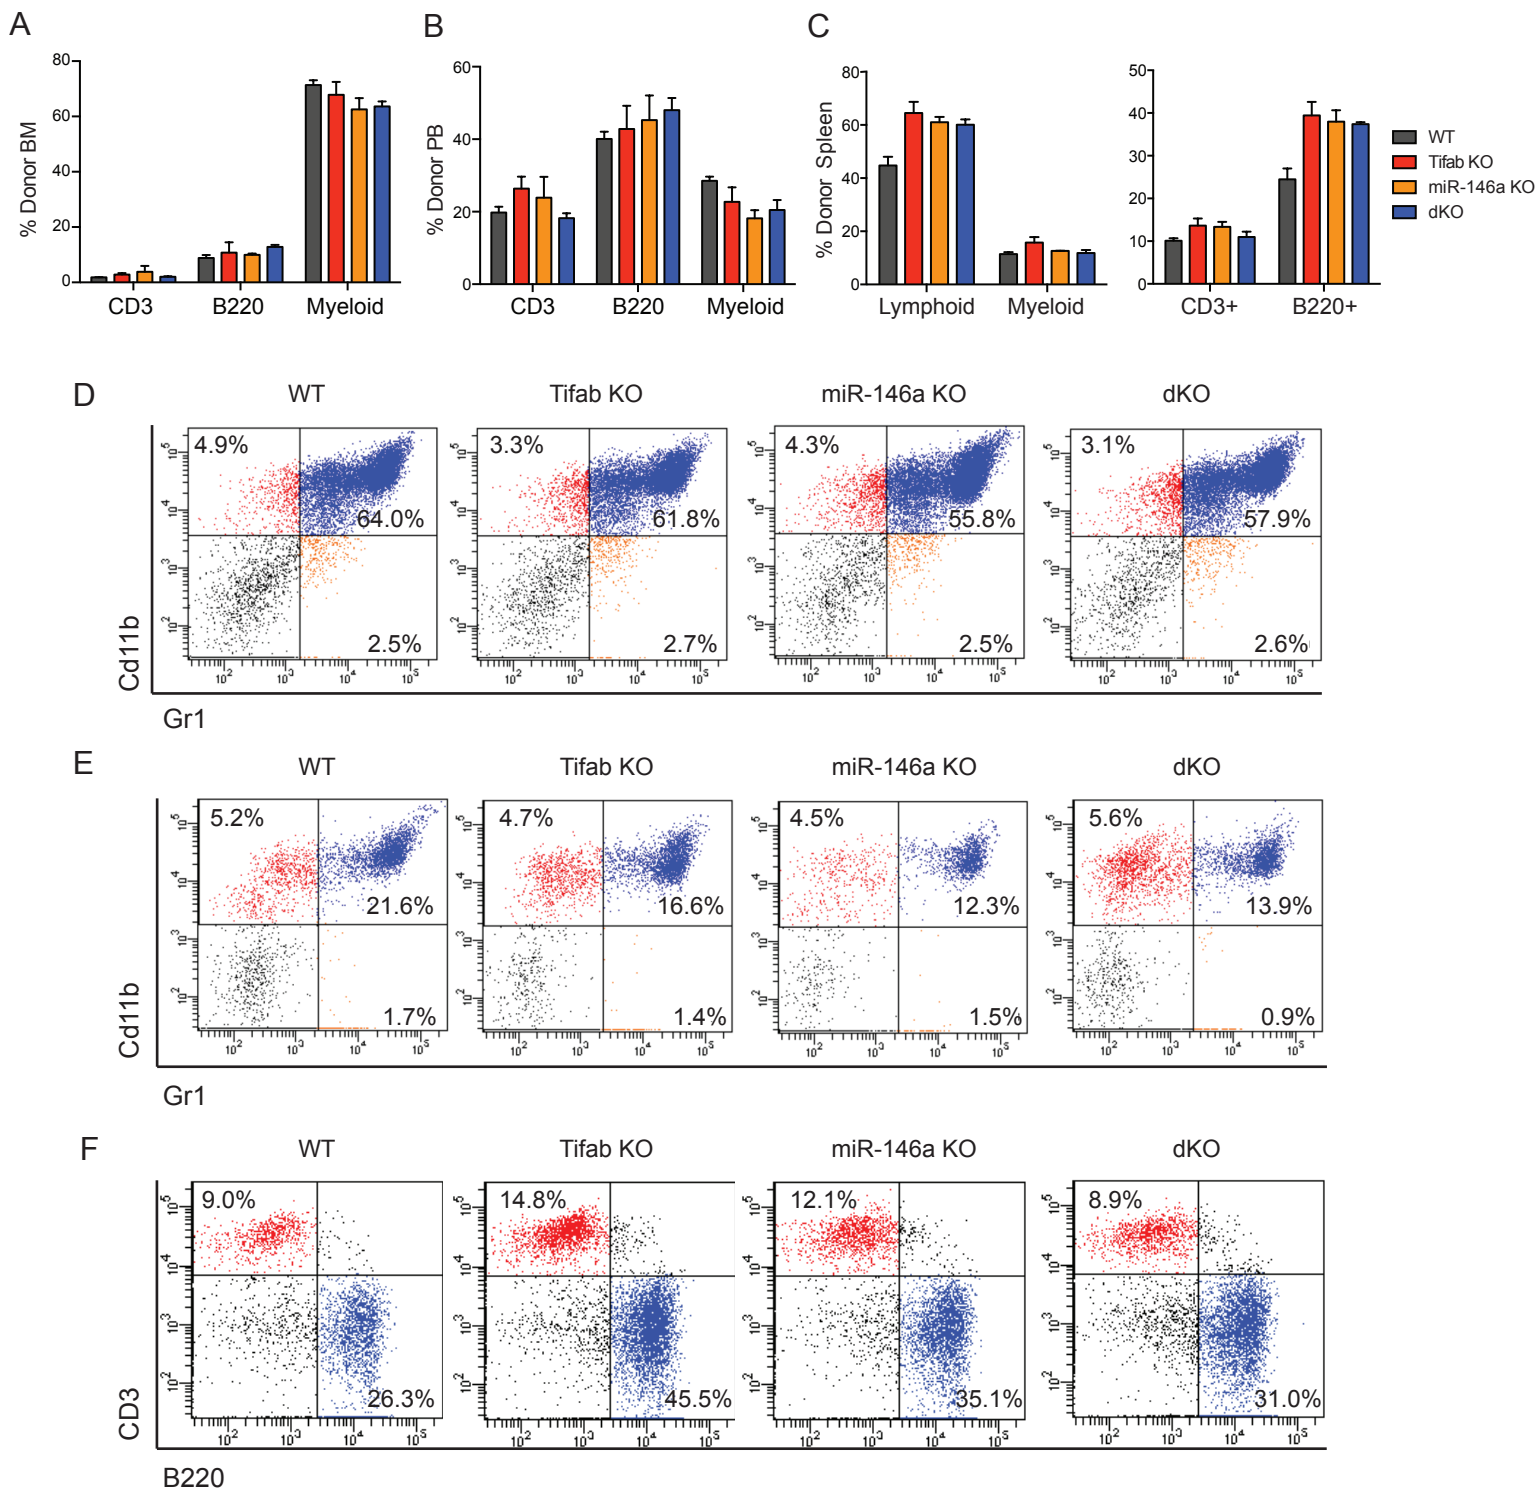

**Immunophenotypic analysis of bone marrow, peripheral blood, and spleen.** (A-C) Flow cytometric analysis of myeloid (CD11b, Gr1) and lymphoid (CD3, B220) proportions within the BM (A), PB (B), and spleen (C) of transplanted mice. (D-F) Representative flow cytometric plots from BM (D), PB (E), and spleen (F). Percent values within dot blots are calculated from the parent gate.

Supplemental Figure 3

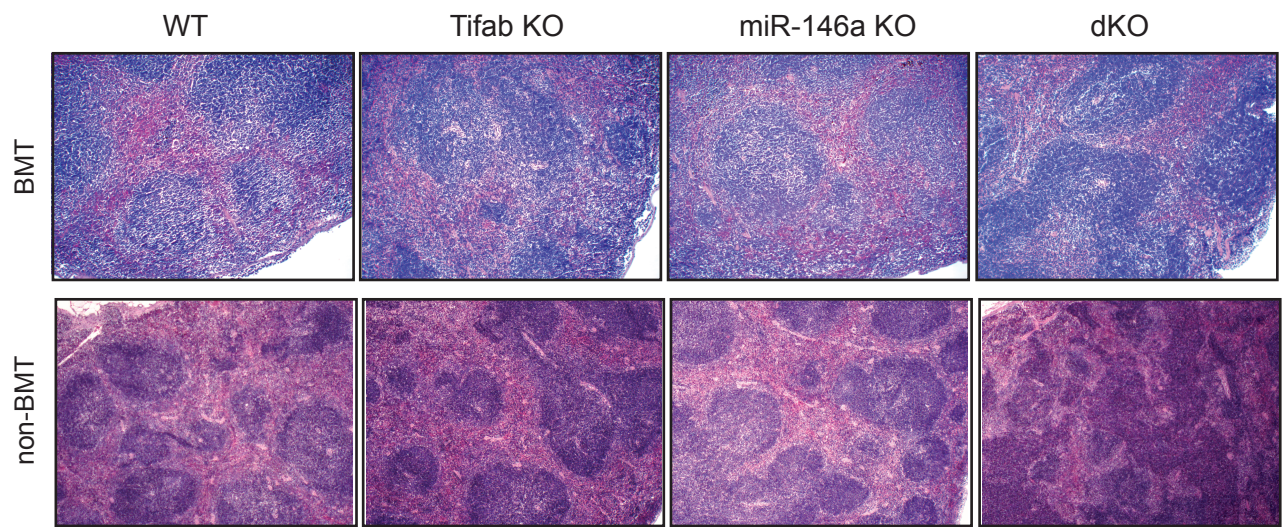

**Morphological analysis of spleens.** H&E-stained spleen from representative mice prior (non-BMT) or after transplantation (BMT).

Supplemental Figure 4.

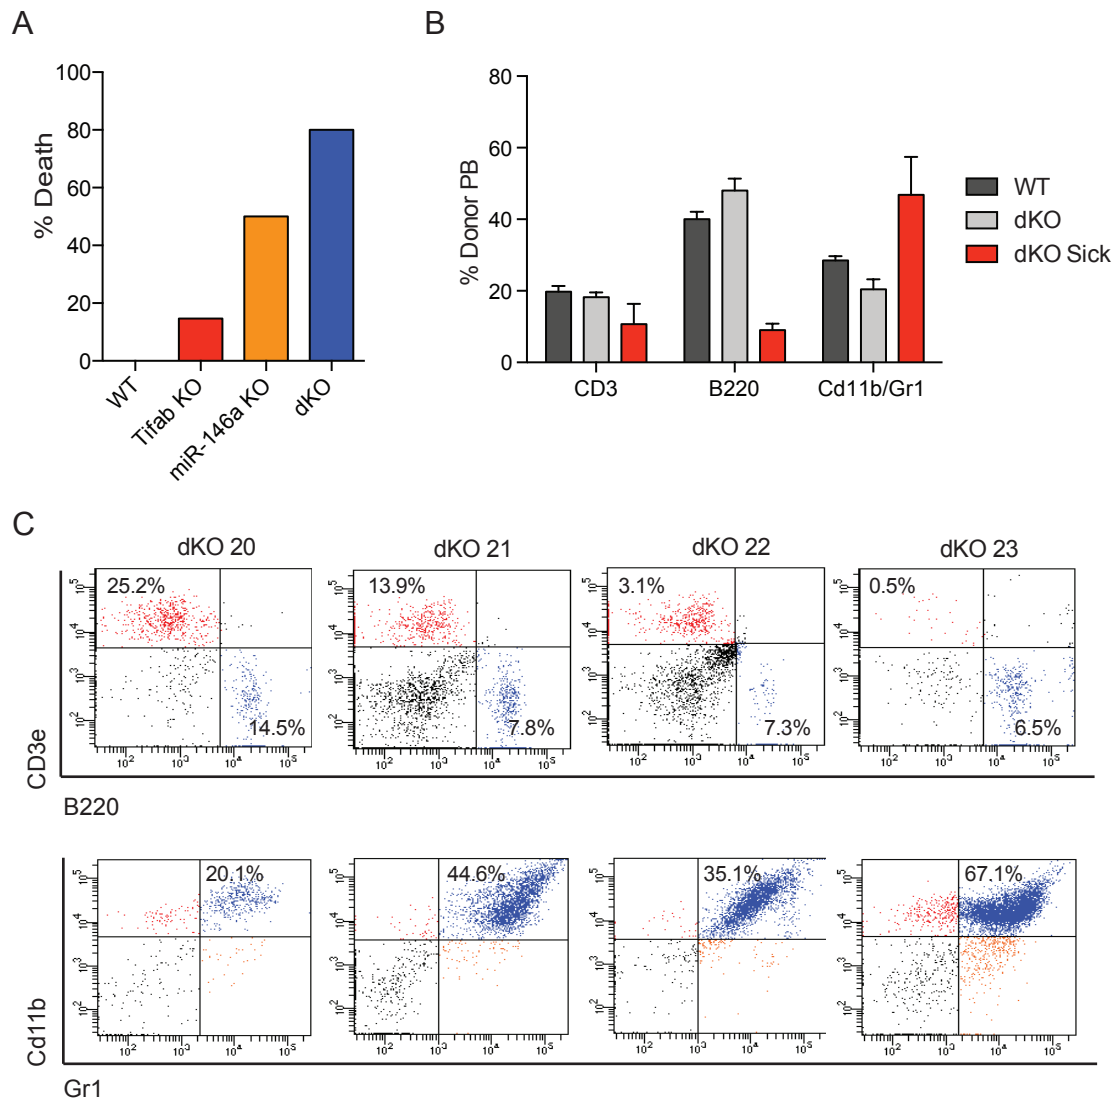

**Analysis of moribund mice.** (A) Percent of mice became moribund after transplantation. (B) Immunophenotype analysis of PB from WT, dKO, and moribund dKO mice. (C) Representative flow cytometric blots of PB cells from four moribund dKO mice. Percent values within dot blots are calculated from the parent gate.

Supplemental Figure 5.

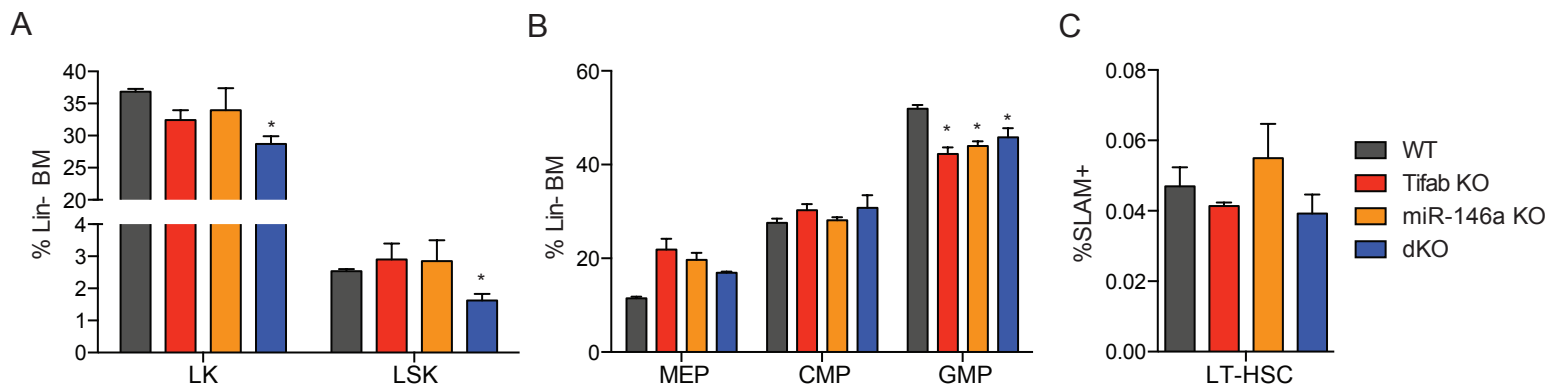

**Analysis of hematopoietic stem/progenitor proportions in the BM.** (A) LK and LSK proportions in BM from mice transplanted with WT, Tifab<sup>-/-</sup>, miR-146a<sup>-/-</sup>, or dKO BM cells (n = 3). (B) MEP, CMP, and GMP proportions in BM from mice transplanted with WT, Tifab<sup>-/-</sup>, miR-146a<sup>-/-</sup>, or dKO BM cells (n = 3). (C) LT-HSC (LSK<sup>+</sup> CD150<sup>+</sup>CD48<sup>-</sup>) proportions in BM from mice transplanted with WT, Tifab<sup>-/-</sup>, miR-146a<sup>-/-</sup>, or dKO BM cells (n = 3). \*, P < 0.05; Student's t-test. In all cases, statistical comparisons were made to WT mice.

Supplemental Figure 6.

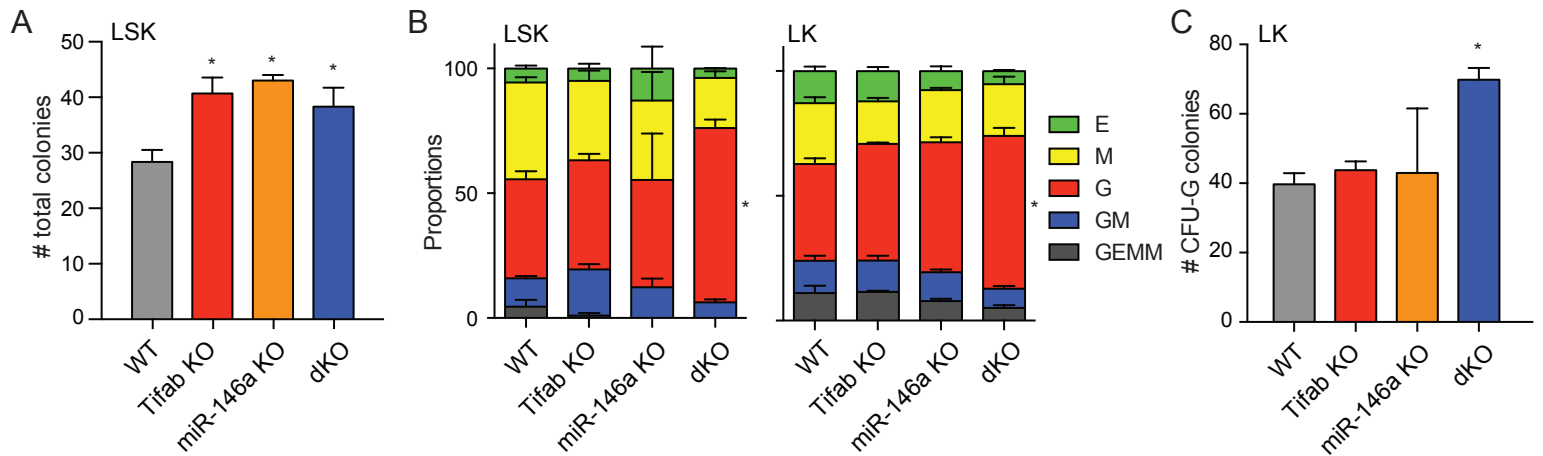

**Analysis of hematopoietic stem/progenitor colony-forming function.** (A) Numbers of colony-forming cells in methylcellulose from LSK cells from WT, Tifab<sup>-/-</sup>, miR-146a<sup>-/-</sup>, or dKO transplanted mice (n = 3). (B) Proportion of colony-forming cells in methylcellulose from LSK or LK isolated from WT, Tifab<sup>-/-</sup>, miR-146a<sup>-/-</sup>, or dKO transplanted mice (n = 3). GM, granulocyte-monocyte; G, granulocyte; M, monocyte; E, erythroid (BFU-E). (C) Numbers of CFU-G from LK cells from WT, Tifab<sup>-/-</sup>, miR-146a<sup>-/-</sup>, or dKO transplanted mice (n = 3).\*, P < 0.05; Student's t-test as compared to WT.

**Supplemental Table 1. Differentially expressed genes in LK.**

**Tifab KO vs WT**

| Gene          | Fold Change (Log2) | P value  | FDR      |
|---------------|--------------------|----------|----------|
| Tifab         | -1.84              | 6.34E-15 | 1.53E-10 |
| Prom1         | 2.27               | 1.58E-10 | 1.90E-06 |
| Doc2          | 1.13               | 1.81E-07 | 0.001    |
| Dnmt          | -1.37              | 1.99E-07 | 0.001    |
| C3            | 1.15               | 2.39E-07 | 0.001    |
| Sic15a2       | 1.83               | 7.26E-07 | 0.003    |
| H2afy         | -1.05              | 9.67E-07 | 0.003    |
| Mtus1         | 1.40               | 9.95E-07 | 0.003    |
| Pgfpyp1       | 1.27               | 1.33E-06 | 0.004    |
| Nucb2         | 1.22               | 1.69E-06 | 0.004    |
| Prkcb         | 1.14               | 1.76E-06 | 0.004    |
| Mexa3         | 1.22               | 4.32E-06 | 0.009    |
| Sycp1         | -0.11              | 5.19E-06 | 0.010    |
| F830028O10Rik | 1.12               | 7.48E-06 | 0.013    |
| Ncam1         | 1.49               | 8.51E-06 | 0.014    |
| B4galnt6      | 1.50               | 1.17E-05 | 0.018    |
| Fcrl1a        | 1.17               | 1.44E-05 | 0.020    |
| G51           | 1.24               | 2.20E-05 | 0.028    |
| Mrc1          | 1.90               | 2.26E-05 | 0.028    |
| Axl           | 1.76               | 2.32E-05 | 0.028    |
| Vcam1         | 1.86               | 3.11E-05 | 0.034    |
| Gem           | -1.19              | 3.21E-05 | 0.034    |
| Mras          | 2.29               | 3.29E-05 | 0.034    |
| Ptn3          | 1.07               | 3.49E-05 | 0.035    |
| Cod5a1        | -1.07              | 3.94E-05 | 0.037    |
| Tex11         | 5.92               | 4.04E-05 | 0.037    |
| Epx           | 1.31               | 4.24E-05 | 0.038    |
| Ear1          | 1.44               | 4.61E-05 | 0.040    |
| Gamb          | 1.00               | 5.59E-05 | 0.045    |
| Igf1          | 2.62               | 5.99E-05 | 0.045    |
| Enah          | 1.63               | 5.94E-05 | 0.046    |
| Gda           | 1.06               | 6.19E-05 | 0.047    |
| Sema1         | -3.11              | 6.36E-05 | 0.047    |
| Lrpuk         | -0.06              | 6.83E-05 | 0.048    |
| Igsf6         | 0.82               | 7.05E-05 | 0.049    |
| C1qb          | 2.80               | 7.37E-05 | 0.049    |
| Abcc2         | 1.85               | 7.49E-05 | 0.049    |
| Bksgnt4       | 0.90               | 7.70E-05 | 0.049    |

**miR-146a KO vs WT**

| Gene          | Fold Change (Log2) | P value  | FDR      |
|---------------|--------------------|----------|----------|
| Lym7          | 3.10               | 3.19E-32 | 7.69E-28 |
| Cmas1         | -2.46              | 9.72E-22 | 1.17E-17 |
| Gzmb          | 1.66               | 5.90E-17 | 4.73E-13 |
| Olfms5        | -8.25              | 1.65E-16 | 9.94E-13 |
| Gm2a          | -1.30              | 1.71E-15 | 8.21E-12 |
| Doc2          | 1.34               | 2.79E-15 | 1.12E-11 |
| Wdfy1         | 1.51               | 4.76E-14 | 1.51E-10 |
| Vps13c        | 1.12               | 5.34E-14 | 1.51E-10 |
| F830028O10Rik | 1.26               | 5.64E-14 | 1.51E-10 |
| 1700112E06Rik | -2.66              | 9.81E-13 | 2.36E-09 |
| Prkcb         | 1.43               | 1.75E-12 | 3.84E-09 |
| Prk35         | 1.42               | 1.17E-11 | 2.36E-08 |
| Cyp11a1       | 2.64               | 5.34E-10 | 9.89E-08 |
| Mtus1         | 1.45               | 1.34E-10 | 2.31E-07 |
| Irgm2         | 1.86               | 2.09E-10 | 3.35E-07 |
| Nkx41         | -1.54              | 8.01E-10 | 1.20E-06 |
| Ctcah7        | 1.37               | 1.33E-09 | 1.84E-06 |
| Egr3          | -1.82              | 8.00E-09 | 1.07E-05 |
| Erd1          | 1.11               | 1.55E-08 | 1.96E-05 |
| Igfp1         | 2.52               | 2.87E-08 | 3.46E-05 |
| Dnt1          | -1.23              | 3.62E-08 | 4.19E-05 |
| Serpina3g     | 0.98               | 5.46E-08 | 5.97E-05 |
| Zbtb16        | 1.05               | 6.85E-08 | 9.26E-05 |
| Nirc5         | 0.94               | 1.01E-07 | 0.0001   |
| Th2           | 2.15               | 1.12E-07 | 0.0002   |
| Gm12250       | 1.51               | 1.60E-07 | 0.0001   |
| Skp2          | 1.02               | 1.73E-07 | 0.0002   |
| Smm3          | -1.04              | 1.76E-07 | 0.0002   |
| C3            | 0.99               | 2.45E-07 | 0.0002   |
| Alm           | 0.75               | 3.00E-07 | 0.0002   |
| Tec2d3        | -1.25              | 3.07E-07 | 0.0002   |
| Irgm1         | 1.03               | 3.74E-07 | 0.0003   |
| Fcrl1a        | 1.02               | 4.11E-07 | 0.0003   |
| Rplp1         | -0.83              | 6.05E-07 | 0.0004   |
| Z810417H13Rik | -0.77              | 6.45E-07 | 0.0004   |
| Nrg1          | 2.57               | 9.18E-07 | 0.0006   |
| Clec5a        | 1.37               | 9.46E-07 | 0.0006   |
| Doc2a         | 0.99               | 9.89E-07 | 0.0007   |
| Stk17b        | -0.82              | 1.14E-06 | 0.0007   |
| Ppbb          | -1.21              | 1.30E-06 | 0.0008   |
| Clec4e3       | 4.99               | 1.33E-06 | 0.0008   |
| Mir394        | 1.70               | 1.79E-06 | 0.0010   |
| Lgcat1        | 0.80               | 1.87E-06 | 0.0010   |
| Tgfp1         | 2.58               | 1.93E-06 | 0.0011   |
| HistH2bc      | -1.50              | 2.02E-06 | 0.0011   |
| Hmg5          | -0.80              | 2.07E-06 | 0.0011   |
| Camk2b        | -3.82              | 2.21E-06 | 0.0011   |
| Rab6b         | -1.33              | 2.41E-06 | 0.0012   |
| Sic31a2       | 1.08               | 2.55E-06 | 0.0013   |
| B4galnt6      | 1.31               | 2.69E-06 | 0.0014   |
| Gstm5         | -0.84              | 3.01E-06 | 0.0014   |
| H1f0          | -0.81              | 3.15E-06 | 0.0015   |
| Gm1966        | 0.69               | 3.45E-06 | 0.0016   |
| Sypx1         | -0.99              | 3.87E-06 | 0.0017   |
| Alp11a        | 0.81               | 4.10E-06 | 0.0018   |
| App           | 0.86               | 4.18E-06 | 0.0018   |
| Sdr21         | 0.82               | 4.75E-06 | 0.0020   |
| P4            | 0.88               | 4.84E-06 | 0.0020   |
| Tmem9         | -1.00              | 5.00E-06 | 0.0020   |
| Znf41-ps      | 1.02               | 6.03E-06 | 0.0024   |
| Sowahc        | 1.02               | 6.05E-06 | 0.0024   |
| Rpl19         | -0.81              | 6.29E-06 | 0.0028   |
| Igf1          | 0.91               | 7.50E-06 | 0.0029   |
| Mras          | 2.15               | 7.68E-06 | 0.0030   |
| Tlil4         | 0.97               | 8.04E-06 | 0.0030   |
| Fhd3a         | 0.88               | 8.23E-06 | 0.0030   |
| Icxf5         | 1.67               | 9.95E-06 | 0.0036   |
| Gpr84         | 2.50               | 1.03E-05 | 0.0036   |
| Rps4x         | -0.92              | 1.12E-05 | 0.0039   |
| Alas1         | 0.74               | 1.14E-05 | 0.0039   |
| R3hdm4        | -0.69              | 1.19E-05 | 0.0040   |
| H2-Q5         | 0.85               | 1.24E-05 | 0.0042   |
| Bpic          | -0.97              | 1.27E-05 | 0.0042   |
| Ccdc69        | -1.05              | 1.29E-05 | 0.0042   |
| Rpl33         | -0.87              | 1.32E-05 | 0.0042   |
| Gpr35         | 2.68               | 1.33E-05 | 0.0042   |
| Tmem50b       | 0.77               | 1.45E-05 | 0.0045   |
| R3hnc1        | -1.25              | 1.51E-05 | 0.0046   |
| HistH3d       | 1.42               | 1.59E-05 | 0.0048   |
| Slamf7        | 1.40               | 1.74E-05 | 0.0052   |
| Scpp5         | 0.80               | 1.80E-05 | 0.0053   |
| H3fb          | -0.72              | 1.83E-05 | 0.0053   |
| Rpl14         | -0.94              | 1.87E-05 | 0.0053   |
| Pdse2a        | 0.98               | 1.89E-05 | 0.0053   |
| Adpgk         | 0.78               | 1.91E-05 | 0.0053   |
| Tlratp3       | -0.85              | 1.91E-05 | 0.0053   |
| Lyl1          | 0.63               | 2.04E-05 | 0.0056   |
| Ahnak         | -0.81              | 2.14E-05 | 0.0058   |
| Ear1          | 1.65               | 2.14E-05 | 0.0058   |
| Parp14        | 0.74               | 2.22E-05 | 0.0060   |
| Sifn5         | 0.82               | 2.26E-05 | 0.0060   |
| Ebf1          | 2.06               | 2.39E-05 | 0.0062   |
| Rps14         | -0.70              | 2.40E-05 | 0.0062   |
| Rhhd2         | 1.11               | 2.46E-05 | 0.0063   |
| Dusp8         | -2.31              | 2.71E-05 | 0.0068   |
| Emt5          | 0.82               | 2.72E-05 | 0.0068   |
| Cont2         | 0.65               | 2.88E-05 | 0.0072   |
| Igll1         | 2.13               | 2.96E-05 | 0.0073   |
| Tmem10        | -0.76              | 3.08E-05 | 0.0075   |
| Per1          | -1.03              | 3.21E-05 | 0.0077   |
| Olfrl1396     | -6.14              | 3.63E-05 | 0.0087   |
| Srafs         | -0.73              | 3.72E-05 | 0.0088   |
| Gpr128        | 0.67               | 3.77E-05 | 0.0088   |
| Pou2af1       | 1.77               | 3.97E-05 | 0.0092   |
| Neo1          | 3.34               | 4.11E-05 | 0.0093   |
| Kcna2         | 4.11               | 4.12E-05 | 0.0093   |
| Acvr1b        | 0.97               | 4.15E-05 | 0.0093   |
| Wdr33os       | -0.70              | 4.38E-05 | 0.0097   |
| Fam46a        | 0.61               | 4.38E-05 | 0.0097   |
| 4930503L19Rik | -0.82              | 4.68E-05 | 0.0102   |
| Gm12185       | 2.03               | 4.74E-05 | 0.0102   |
| Abca13        | 1.21               | 4.74E-05 | 0.0102   |
| Tnfrsf15      | 3.46               | 5.03E-05 | 0.0107   |
| Stat1         | 0.63               | 6.11E-05 | 0.0127   |
| G2e3          | 0.76               | 6.12E-05 | 0.0127   |
| Foab          | -0.99              | 6.13E-05 | 0.0127   |
| Cp            | 1.72               | 6.22E-05 | 0.0128   |
| Igfb6         | 0.75               | 6.52E-05 | 0.0132   |
| Tifab         | 0.66               | 6.54E-05 | 0.0132   |
| Cdkn1a        | -0.89              | 7.11E-05 | 0.0147   |
| Dmat2         | 0.74               | 7.41E-05 | 0.0147   |
| Rps10         | -0.80              | 7.90E-05 | 0.0156   |
| Camp1         | -0.94              | 7.99E-05 | 0.0156   |
| Cers6         | 0.61               | 8.06E-05 | 0.0156   |
| Zfp518b       | 0.87               | 8.20E-05 | 0.0158   |
| Flx           | 0.87               | 8.36E-05 | 0.0160   |
| Uoua4         | 0.59               | 8.46E-05 | 0.0160   |
| Rasgef1b      | -0.99              | 8.53E-05 | 0.0160   |
| Atp8b4        | 0.68               | 8.76E-05 | 0.0163   |
| 1110038B12Rik | 0.65               | 8.86E-05 | 0.0163   |
| Crip1         | -0.67              | 8.91E-05 | 0.0163   |
| Sivn3         | 0.65               | 8.95E-05 | 0.0163   |
| Rplk1         | 0.60               | 9.10E-05 | 0.0164   |
| Tnfrsf12a     | -1.35              | 9.13E-05 | 0.0164   |
| S1pr3         | 0.93               | 9.35E-05 | 0.0167   |
| Rrm2          | 0.58               | 9.50E-05 | 0.0168   |
| Bhlhe40       | -1.28              | 9.75E-05 | 0.0171   |
| Rpl32         | -0.74              | 9.80E-05 | 0.0174   |

**dKO vs WT**

| Gene          | Fold Change (Log2) | P value  | FDR      |
|---------------|--------------------|----------|----------|
| Lym7          | 3.15               | 1.87E-28 | 4.03E-24 |
| Wdfy1         | 2.23               | 2.89E-26 | 3.48E-22 |
| Tifab         | -2.79              | 2.36E-18 | 1.89E-14 |
| Gm2a          | -1.34              | 1.17E-15 | 7.01E-12 |
| Foab          | -1.31              | 5.48E-14 | 2.84E-10 |
| Tec2d3        | -1.65              | 7.32E-13 | 2.94E-09 |
| Olfms5        | -5.38              | 2.38E-12 | 8.19E-09 |
| H2afy         | -1.03              | 1.73E-10 | 5.19E-07 |
| Rplp1         | -1.16              | 3.82E-09 | 1.02E-05 |
| Emp1          | -2.06              | 1.93E-08 | 4.66E-05 |
| Vps13c        | 0.90               | 4.14E-08 | 9.05E-05 |
| G2e3          | 1.11               | 5.42E-08 | 0.0001   |
| Crip1         | -1.19              | 8.04E-08 | 0.0001   |
| Ahnak         | -0.90              | 1.71E-07 | 0.0003   |
| Lyp1a1        | 3.23               | 2.28E-07 | 0.0004   |
| Gdppp1        | 1.61               | 3.11E-07 | 0.0005   |
| Ncam1         | 1.82               | 3.47E-07 | 0.0005   |
| Skp2          | 0.93               | 5.06E-07 | 0.0007   |
| 4930433N12Rik | 5.09               | 6.69E-07 | 0.0008   |
| F830028O10Rik | 1.03               | 6.74E-07 | 0.0008   |
| Smm3          | -1.02              | 9.77E-07 | 0.0011   |
| Kf10          | -0.93              | 1.11E-06 | 0.0012   |
| Cdkn1a        | -1.24              | 1.22E-06 | 0.0013   |
| Klh42         | 1.13               | 1.91E-06 | 0.0019   |
| Rplp2         | -0.82              | 2.16E-06 | 0.0019   |
| G53001106Rik  | 1.11               | 2.33E-06 | 0.0022   |
| Perp          | -1.77              | 3.22E-06 | 0.0029   |
| Doc2          | 1.08               | 5.11E-06 | 0.0043   |
| Zfp354a       | 4.73               | 5.29E-06 | 0.0043   |
| Bhlhe40       | -1.58              | 5.33E-06 | 0.0043   |
| Sic2e2a       | 1.07               | 6.51E-06 | 0.0051   |
| Rps15         | -0.67              | 6.94E-06 | 0.0052   |
| Kl4           | -0.91              | 7.07E-06 | 0.0052   |
| Lbc           | -1.02              | 8.09E-06 | 0.0057   |
| Kcnj2         | 1.26               | 9.09E-06 | 0.0062   |
| Rpl37a        | -0.78              | 9.39E-06 | 0.0062   |
| Erd1          | 1.05               | 9.47E-06 | 0.0062   |
| Vcam1         | 2.11               | 1.67E-05 | 0.0074   |
| Clec4a3       | 6.07               | 1.48E-05 | 0.0089   |
| Cernp1        | -0.90              | 1.49E-05 | 0.0089   |
| Rps26         | -0.73              | 1.99E-05 | 0.0092   |
| Sic31a2       | 1.01               | 1.99E-05 | 0.0094   |
| Per1          | -1.22              | 1.78E-05 | 0.0100   |
| Rps14         | -0.92              | 1.97E-05 | 0.0108   |
| Vamp6         | -0.93              | 2.02E-05 | 0.0108   |
| Olfrl1396     | -6.16              | 2.19E-05 | 0.0114   |
| Tmem9         | -0.95              | 2.32E-05 | 0.0119   |
| R3hdm4        | -0.77              | 2.39E-05 | 0.0120   |
| Mtus1         | 1.29               | 2.65E-05 | 0.0129   |
| Pdse3p3       | 0.66               | 2.67E-05 | 0.0134   |
| Codc107       | -1.46              | 2.74E-05 | 0.0129   |
| Kl8           | -0.77              | 2.87E-05 | 0.0134   |
| Adpgk         | 0.85               | 3.06E-05 | 0.0134   |
| Rpl33         | -0.76              | 3.14E-05 | 0.0134   |
| Rc3h2         | 0.76               | 3.14E-05 | 0.0134   |
| Irgm1         | 1.13               | 3.14E-05 | 0.0134   |
| Rasa2         | 0.99               | 3.18E-05 | 0.0134   |
| Kcnj2         | 1.22               | 3.26E-05 | 0.0136   |
| Aoah          | -1.13              | 3.32E-05 | 0.0135   |
| Stard6        | 1.50               | 3.42E-05 | 0.0137   |
| Tgfp1         | 3.70               | 3.56E-05 | 0.0141   |
| Igfb1         | -1.20              | 4.17E-05 | 0.0152   |
| Nrg1          | 3.13               | 3.73E-05 | 0.0143   |
| Clec5a        | 1.69               | 4.05E-05 | 0.0152   |
| Dusp16        | -0.81              | 4.11E-05 | 0.0152   |
| Th2           | 2.60               | 4.23E-05 | 0.0152   |
| Cyp11a1       | 2.60               | 4.23E-05 | 0.0152   |
| Emt5          | 0.90               | 4.29E-05 | 0.0152   |
| Abca13        | 2.23               | 4.68E-05 | 0.0163   |
| Tlil1         | -0.68              | 5.30E-05 | 0.0162   |
| Phk2a2a       | 0.82               | 5.49E-05 | 0.0186   |
| Mit1          | 0.85               | 5.64E-05 | 0.0189   |
| Pcdha8        | 5.70               | 5.73E-05 | 0.0189   |
| Cmas1         | -0.99              | 6.01E-05 | 0.0196   |
| HistH3d       | 1.79               | 6.49E-05 | 0.0208   |
| Rpl36         | -0.82              | 6.74E-05 | 0.0213   |
| Alm           | 0.79               | 7.17E-05 | 0.0224   |
| Gpr128        | 0.78               | 7.60E-05 | 0.0232   |
| Bpic          | -1.01              | 7.62E-05 | 0.0232   |
| Sifn9         | 0.83               | 7.87E-05 | 0.0237   |
| Zfp16         | 0.90               | 8.17E-05 | 0        |

|               |       |           |        |
|---------------|-------|-----------|--------|
| Exx           | 1.20  | 0.0001003 | 0.0174 |
| Fndc7         | 3.31  | 0.0001023 | 0.0176 |
| Rps3a1        | -0.61 | 0.0001044 | 0.0177 |
| Vwf           | -0.68 | 0.0001045 | 0.0177 |
| Atap1         | 0.86  | 0.0001057 | 0.0178 |
| Car12         | 0.90  | 0.0001065 | 0.0178 |
| Car1          | -0.62 | 0.0001076 | 0.0178 |
| Gpatch4       | -0.86 | 0.0001077 | 0.0178 |
| Gbp7          | 0.60  | 0.0001111 | 0.0181 |
| Gm1821        | -1.39 | 0.0001116 | 0.0181 |
| Msp1          | -0.59 | 0.0001178 | 0.0189 |
| Ier2          | -0.75 | 0.0001178 | 0.0189 |
| Gdppg1        | 1.08  | 0.0001185 | 0.0189 |
| Comm4         | -0.88 | 0.0001196 | 0.0189 |
| Zfp346        | 0.76  | 0.0001259 | 0.0197 |
| Homez         | 0.93  | 0.0001259 | 0.0197 |
| Rpl37a        | -0.62 | 0.0001281 | 0.0199 |
| Calr          | 0.67  | 0.0001292 | 0.0199 |
| Gda           | 0.79  | 0.0001358 | 0.0208 |
| Lmna          | -1.04 | 0.0001408 | 0.0214 |
| Rpl13         | -0.62 | 0.0001451 | 0.0220 |
| Vamp8         | -0.67 | 0.0001458 | 0.0220 |
| Finem         | 0.65  | 0.0001478 | 0.0220 |
| Trc           | 1.60  | 0.0001486 | 0.0220 |
| Neur3         | -0.74 | 0.0001491 | 0.0220 |
| Zbtb10        | -0.84 | 0.0001502 | 0.0220 |
| Fhb           | 0.56  | 0.0001631 | 0.0238 |
| Ubs52         | -0.80 | 0.0001677 | 0.0243 |
| Chordc1       | 0.61  | 0.0001701 | 0.0245 |
| Uqcrq         | 0.66  | 0.0001716 | 0.0246 |
| Wdr65         | 3.21  | 0.0001738 | 0.0247 |
| Gm6297        | 1.46  | 0.0001742 | 0.0247 |
| Gm10451       | 3.10  | 0.0001762 | 0.0247 |
| Tsc22d1       | -0.56 | 0.0001766 | 0.0247 |
| Far2          | 0.79  | 0.0001814 | 0.0252 |
| Zfp780b       | 0.86  | 0.0001858 | 0.0257 |
| Pik3c2a       | 0.69  | 0.000188  | 0.0258 |
| Nav2          | 0.73  | 0.0001885 | 0.0258 |
| Frit2         | -0.58 | 0.0001894 | 0.0259 |
| Hdc1          | -0.80 | 0.0001916 | 0.0259 |
| Dok           | 0.96  | 0.000195  | 0.0262 |
| Prom1         | 1.16  | 0.0001956 | 0.0262 |
| Zfp780        | 0.95  | 0.0002002 | 0.0266 |
| Bag1          | -0.67 | 0.0002045 | 0.0270 |
| Chdh          | 0.56  | 0.0002056 | 0.0270 |
| Il18bp        | 1.04  | 0.0002085 | 0.0273 |
| Papss2        | 0.64  | 0.0002099 | 0.0273 |
| Syr1          | 0.61  | 0.0002107 | 0.0273 |
| Megf6         | 5.64  | 0.0002132 | 0.0274 |
| Kcnj2         | 0.98  | 0.000217  | 0.0278 |
| Pfms          | -1.12 | 0.0002187 | 0.0278 |
| Sgpl1         | 1.39  | 0.0002278 | 0.0288 |
| Cd300e        | 5.49  | 0.0002295 | 0.0289 |
| H2-Ab1        | 0.58  | 0.0002313 | 0.0290 |
| Gm10248       | -3.82 | 0.0002337 | 0.0291 |
| Ubb           | -1.54 | 0.0002374 | 0.0293 |
| Rps5          | -0.73 | 0.0002376 | 0.0293 |
| Sic35a5       | 0.99  | 0.0002417 | 0.0296 |
| Zscan29       | 0.67  | 0.0002426 | 0.0296 |
| Cow11         | -0.38 | 0.0002445 | 0.0297 |
| Tet2          | 0.57  | 0.0002454 | 0.0297 |
| Vcam1         | 1.23  | 0.0002485 | 0.0298 |
| D230029D16Rik | 0.64  | 0.0002487 | 0.0298 |
| Spr1a         | 6.89  | 0.0002558 | 0.0299 |
| Irfm2         | -0.74 | 0.0002562 | 0.0304 |
| Itripl2       | 0.66  | 0.0002621 | 0.0308 |
| B230219D22Rik | 0.59  | 0.0002627 | 0.0308 |
| Zfp184        | -0.62 | 0.0002699 | 0.0314 |
| Rc3h2         | 0.62  | 0.00027   | 0.0314 |
| A630072M18Rik | 0.85  | 0.0002786 | 0.0322 |
| Srz2          | 0.63  | 0.0002901 | 0.0331 |
| E230008N13Rik | -1.67 | 0.0002912 | 0.0331 |
| Ser           | 0.64  | 0.0002913 | 0.0331 |
| Anp32b        | -0.60 | 0.0002921 | 0.0331 |
| Zdhc21        | 0.57  | 0.000293  | 0.0331 |
| Srbp1         | 2.43  | 0.0002963 | 0.0333 |
| Serinc4       | 1.22  | 0.0002978 | 0.0333 |
| Rpl9          | -0.60 | 0.000325  | 0.0362 |
| Dyrk3         | -0.68 | 0.0003265 | 0.0362 |
| Zfp783        | 0.86  | 0.0003307 | 0.0364 |
| Faim3         | 5.42  | 0.0003316 | 0.0364 |
| Med23         | 0.61  | 0.000338  | 0.0370 |
| Cyp2r1        | 1.59  | 0.0003403 | 0.0371 |
| Gm15915       | -0.66 | 0.0003486 | 0.0378 |
| Rbm5          | 0.55  | 0.0003566 | 0.0386 |
| Rint1         | 0.73  | 0.0003668 | 0.0394 |
| Stat2         | 0.75  | 0.0003733 | 0.0399 |
| Gbp5          | 0.92  | 0.0003755 | 0.0400 |
| Cas7          | 0.92  | 0.0003856 | 0.0403 |
| Zfp324        | 0.90  | 0.0003893 | 0.0411 |
| Z810403A07Rik | 0.60  | 0.000392  | 0.0412 |
| Rpl36a        | -0.57 | 0.0003952 | 0.0413 |
| Zbtb40        | 0.73  | 0.0004021 | 0.0419 |
| Sic5a3        | 0.69  | 0.0004061 | 0.0419 |
| Sik1          | -0.64 | 0.0004064 | 0.0419 |
| Rassf4        | 0.59  | 0.0004076 | 0.0419 |
| Hsp1          | 0.59  | 0.0004147 | 0.0425 |
| Mtr           | 0.58  | 0.0004174 | 0.0426 |
| Klf10         | -0.71 | 0.0004232 | 0.0429 |
| Rab4a         | -0.76 | 0.0004248 | 0.0429 |
| Trmpc         | 0.76  | 0.0004267 | 0.0429 |
| BC055324      | 0.63  | 0.0004277 | 0.0429 |
| Cybb          | 0.71  | 0.0004347 | 0.0434 |
| Lis4h         | 0.54  | 0.0004409 | 0.0438 |
| Rpl24         | -0.57 | 0.000444  | 0.0440 |
| Pfme2b        | 1.43  | 0.0004458 | 0.0444 |
| Sic7a8        | 0.60  | 0.000455  | 0.0447 |
| Csf2rb2       | 0.79  | 0.0004577 | 0.0448 |
| Hhrs          | 5.86  | 0.0004609 | 0.0449 |
| Hesr15b       | 0.63  | 0.0004707 | 0.0457 |
| Met           | 0.62  | 0.0004735 | 0.0458 |
| Rnt1          | 0.72  | 0.000477  | 0.0459 |
| Lg4           | 1.56  | 0.0004843 | 0.0464 |
| Lbp1          | 0.92  | 0.0004856 | 0.0464 |
| Palb2         | 0.79  | 0.0004903 | 0.0465 |
| A530099J19Rik | 1.94  | 0.000492  | 0.0465 |
| Lz2           | 1.79  | 0.0004924 | 0.0465 |
| Srrm40        | -0.59 | 0.0005215 | 0.0487 |
| Ear6          | 1.83  | 0.0005219 | 0.0487 |
| Lsm5          | -0.91 | 0.000522  | 0.0487 |
| Cdcb          | 0.59  | 0.0005295 | 0.0487 |
| Neur1         | 0.72  | 0.000529  | 0.0487 |
| Pla2g15       | 1.20  | 0.0005398 | 0.0498 |

**Supplemental Table 2. Synergy Genes in dKO LK.**

| Gene    | Relative Expression |                |           | SynergyEffect |
|---------|---------------------|----------------|-----------|---------------|
|         | miR-146a KO vs WT   | Tifab KO vs WT | dKO vs WT |               |
| Dgkk    | 14.84               | 13.42          | 52.88     | 0.53          |
| Ltf     | 3.64                | 5.85           | 16.93     | 0.56          |
| Ngp     | 2.17                | 3.44           | 9.78      | 0.57          |
| Cd300e  | 45.04               | 12.87          | 82.53     | 0.70          |
| Lypd6   | 15.53               | 13.63          | 40.54     | 0.72          |
| Mir677  | 14.84               | 11.06          | 28.55     | 0.91          |
| Gpr84   | 5.64                | 4.66           | 10.30     | 1.00          |
| Timm8a2 | 20.60               | 32.50          | 52.46     | 1.01          |
| Sfrp1   | 14.56               | 30.72          | 41.74     | 1.08          |
| Nrg1    | 5.93                | 3.57           | 8.74      | 1.09          |
| Abca13  | 2.32                | 2.92           | 4.71      | 1.11          |
| Gdpgp1  | 2.12                | 1.54           | 3.05      | 1.20          |
| Neo1    | 10.16               | 6.63           | 13.69     | 1.23          |
| Acpp    | 2.42                | 2.91           | 4.24      | 1.26          |
| Ncam1   | 1.64                | 2.80           | 3.53      | 1.26          |
| Spint1  | 31.74               | 12.74          | 32.83     | 1.35          |
| Vcam1   | 2.35                | 3.63           | 4.33      | 1.38          |
| Itga1   | 1.46                | 1.80           | 2.30      | 1.41          |
| Gramd3  | 1.65                | 1.68           | 2.32      | 1.43          |
| Stc2    | 5.78                | 6.02           | 8.20      | 1.44          |
| Csf2ra  | 1.44                | 1.47           | 2.01      | 1.45          |
| Stard5  | 1.70                | 1.54           | 2.22      | 1.46          |
| Scgb3a1 | 12.37               | 21.75          | 22.95     | 1.49          |
| Ifi204  | 2.67                | 3.12           | 3.89      | 1.49          |
| Clca1   | 1.58                | 1.69           | 2.18      | 1.50          |
| Kcnj2   | 1.97                | 1.69           | 2.39      | 1.53          |
| Gbp8    | 9.97                | 8.33           | 11.92     | 1.53          |
| Higd1b  | 12.37               | 11.46          | 15.37     | 1.55          |
| Mlxipl  | 18.86               | 25.93          | 28.52     | 1.57          |
| Slfn2   | 2.76                | 3.01           | 3.66      | 1.58          |
| Papss2  | 1.56                | 1.64           | 2.02      | 1.58          |
| Clec5a  | 2.59                | 2.70           | 3.22      | 1.64          |
| Prkcb   | 2.69                | 2.21           | 2.95      | 1.66          |
| Ceacam1 | 1.49                | 1.43           | 1.75      | 1.66          |



**Supplemental Table 3. Del(5q) MDS/AML patient characteristics.**

| <b>Disease</b> | <b>Risk</b> | <b>TIFAB deletion</b> | <b>miR-146a deletion</b> |
|----------------|-------------|-----------------------|--------------------------|
| sAML           | 1           | Yes                   | No                       |
| MDS            | 0           | Yes                   | No                       |
| MDS            | 0           | Yes                   | No                       |
| sAML           | 1           | Yes                   | Yes                      |
| MDS            | 1           | Yes                   | Yes                      |
| MDS            | 0           | Yes                   | Yes                      |
| MDS            | 1           | Yes                   | Yes                      |
| MDS            | 1           | Yes                   | Yes                      |
| MDS            | 0           | Yes                   | Yes                      |

Risk: 1, high-risk; 0, low-risk  
sAML, secondary AML.
